# Supplementary material
Source: PubMed Central journal article supplement (PMC8716518)
Supplement: NIHMS1758057-supplement-Supplementa3l_Table.pdf [file NIHMS1758057-supplement-Supplementa3l_Table.pdf]

## LPS\_Sham MV versus NoMV

|            | Log2 fold | std error | (Lower con | Upper con | Linear fold | Lower con | Upper con | P-value  | Gene.sets   | probe.ID            |
|------------|-----------|-----------|------------|-----------|-------------|-----------|-----------|----------|-------------|---------------------|
| Tmem173-   | 6.09      | 0.761     | 4.6        | 7.58      | 68          | 24.2      | 191       | 2.24E-06 | Host-pathr  | NM_028261.1:130     |
| Icam2-mRI  | 7.18      | 0.908     | 5.4        | 8.96      | 145         | 42.3      | 499       | 2.53E-06 | Adaptive li | NM_010494.1:375     |
| Il2rg-mRN  | 4.78      | 0.753     | 3.3        | 6.25      | 27.4        | 9.85      | 76.3      | 2.57E-05 | Cytokine S  | NM_013563.3:1226    |
| Pdcd2-mR   | 4.56      | 0.743     | 3.11       | 6.02      | 23.6        | 8.61      | 64.9      | 3.56E-05 | Apoptosis   | NM_008799.2:837     |
| Ifngr1-mRI | 4.19      | 0.724     | 2.77       | 5.6       | 18.2        | 6.81      | 48.6      | 6.35E-05 | Cytokine S  | NM_010511.2:985     |
| Il1rl1-mRN | 4.05      | 0.756     | 2.57       | 5.53      | 16.6        | 5.93      | 46.3      | 0.000131 | Cytokine S  | NM_001025602.2:815  |
| Map4k2-r   | 4.34      | 0.951     | 2.48       | 6.21      | 20.3        | 5.57      | 73.9      | 0.00053  | TNF Famil   | NM_009006.2:666     |
| Lta-mRNA   | 5         | 1.1       | 2.85       | 7.14      | 31.9        | 7.21      | 142       | 0.000534 | Cytokine S  | NM_010735.1:1115    |
| Trp53-mRI  | 2.23      | 0.489     | 1.27       | 3.19      | 4.69        | 2.41      | 9.1       | 0.000534 | Apoptosis,  | NM_011640.1:1835    |
| Tlr4-mRNA  | 2.96      | 0.656     | 1.68       | 4.25      | 7.78        | 3.19      | 19        | 0.000582 | Adaptive li | NM_021297.2:2510    |
| Cd8a-mRN   | 4.41      | 0.991     | 2.47       | 6.35      | 21.3        | 5.53      | 81.8      | 0.000656 | Adaptive li | NM_001081110.2:355  |
| Ebi3-mRN   | 2.11      | 0.48      | 1.17       | 3.05      | 4.31        | 2.24      | 8.27      | 0.000731 | Cytokine S  | NM_015766.2:1015    |
| Il7r-mRNA  | 3.74      | 0.864     | 2.05       | 5.44      | 13.4        | 4.14      | 43.4      | 0.000813 | Cytokine S  | NM_008372.3:1020    |
| Itgax-mRN  | 4.85      | 1.14      | 2.61       | 7.08      | 28.8        | 6.11      | 135       | 0.000947 | Cell Adhes  | NM_021334.2:3773    |
| Blnk-mRN   | 2.68      | 0.634     | 1.44       | 3.93      | 6.42        | 2.71      | 15.2      | 0.00098  | Adaptive li | NM_008528.4:1546    |
| Abcf1-mRI  | 2.71      | 0.643     | 1.45       | 3.97      | 6.56        | 2.74      | 15.7      | 0.001    | Immunom     | NM_013854.1:875     |
| Ptafr-mRN  | 3.87      | 0.924     | 2.06       | 5.68      | 14.6        | 4.17      | 51.3      | 0.00106  | Cytokine S  | NM_001081211.1:1685 |
| Traf3-mRN  | 4.15      | 1         | 2.19       | 6.12      | 17.8        | 4.57      | 69.4      | 0.00114  | Cytokine S  | NM_001048206.1:6385 |
| Ikbkap-mR  | 2.99      | 0.722     | 1.58       | 4.41      | 7.97        | 2.99      | 21.2      | 0.00115  | NF-kB Sign  | NM_026079.3:38      |
| Cxcl10-mR  | 3.04      | 0.763     | 1.54       | 4.53      | 8.21        | 2.91      | 23.2      | 0.00157  | Chemokin    | NM_021274.1:115     |
| Stat5b-mR  | 4.32      | 1.15      | 2.06       | 6.58      | 20          | 4.18      | 95.7      | 0.00243  | Chemokin    | NM_011489.3:4855    |
| Atg16l1-m  | 2.31      | 0.619     | 1.1        | 3.53      | 4.97        | 2.14      | 11.5      | 0.00249  | Autophagy   | NM_029846.3:1250    |
| Il6-mRNA   | 2.52      | 0.681     | 1.19       | 3.86      | 5.74        | 2.28      | 14.5      | 0.00265  | Cytokine S  | NM_031168.1:40      |
| Tap1-mRN   | 2.39      | 0.659     | 1.1        | 3.68      | 5.25        | 2.14      | 12.9      | 0.00307  | Adaptive li | NM_001161730.1:856  |
| Jak2-mRN   | 3.22      | 0.909     | 1.44       | 5         | 9.31        | 2.71      | 32        | 0.00362  | Chemokin    | NM_001048177.1:730  |
| Tlr3-mRNA  | 4.52      | 1.28      | 2.02       | 7.03      | 23          | 4.05      | 131       | 0.00363  | Host-pathr  | NM_126166.2:1165    |
| Mr1-mRN    | 4.79      | 1.36      | 2.13       | 7.45      | 27.6        | 4.36      | 175       | 0.00373  | MHC Class   | NM_008209.4:1360    |
| Il4ra-mRN  | 3.57      | 1.03      | 1.56       | 5.58      | 11.9        | 2.94      | 48        | 0.00411  | Cytokine S  | NM_001008700.3:670  |
| Irf1-mRNA  | 3.12      | 0.911     | 1.34       | 4.91      | 8.71        | 2.53      | 30        | 0.00448  | Cytokine S  | NM_008390.1:365     |
| Ube2l3-mf  | 3.1       | 0.947     | 1.24       | 4.95      | 8.55        | 2.36      | 31        | 0.00612  | Adaptive li | NM_009456.2:1817    |
| Slamf7-mF  | 2.89      | 0.895     | 1.14       | 4.64      | 7.42        | 2.2       | 25        | 0.00656  | Adaptive li | NM_144539.5:750     |
| H2-DMA-r   | 3.36      | 1.05      | 1.3        | 5.43      | 10.3        | 2.46      | 43        | 0.00705  | Cell Adhes  | NM_010386.3:530     |
| Ceacam1-r  | 3.36      | 1.05      | 1.29       | 5.43      | 10.3        | 2.45      | 43        | 0.00716  | Hemostasi   | NM_001039185.1:294  |
| Irak3-mRN  | 2.23      | 0.702     | 0.853      | 3.61      | 4.69        | 1.81      | 12.2      | 0.00733  | Cytokine S  | NM_028679.3:921     |
| Traf6-mRN  | -2.15     | 0.682     | -3.48      | -0.809    | 0.226       | 0.0895    | 0.571     | 0.00772  | Adaptive li | NM_009424.2:980     |
| CtsG-mRN   | -4.43     | 1.41      | -7.19      | -1.66     | 0.0465      | 0.00684   | 0.316     | 0.00786  | Host-pathr  | NM_007800.1:785     |

## LPS\_Burn day 1 MV versus NoMV

|           | Log2 fold | std error | (Lower con | Upper con | Linear fold | Lower con | Upper con | P-value | Gene.sets  | probe.ID            |
|-----------|-----------|-----------|------------|-----------|-------------|-----------|-----------|---------|------------|---------------------|
| Cd109-mR  | -3.49     | 1.08      | -5.6       | -1.37     | 0.0891      | 0.0206    | 0.386     | 0.00657 | Hemostasi  | NM_153098.3:2720    |
| S100a8-mI | -3.34     | 1.05      | -5.4       | -1.28     | 0.0988      | 0.0237    | 0.411     | 0.0072  | Innate lmr | NM_013650.2:227     |
| Ccl22-mRN | -4.13     | 1.31      | -6.7       | -1.55     | 0.0573      | 0.00962   | 0.341     | 0.00781 | Chemokin   | NM_009137.2:1096    |
| Csf3r-mRN | -4.24     | 1.35      | -6.9       | -1.59     | 0.0528      | 0.00838   | 0.332     | 0.0079  | Cytokine S | NM_001252651.1:1294 |

## LPS\_Burn day 7 MV versus NoMV

|           | Log2 fold | std error | (Lower con | Upper con | Linear fold | Lower con | Upper con | P-value | Gene.sets  | probe.ID            |
|-----------|-----------|-----------|------------|-----------|-------------|-----------|-----------|---------|------------|---------------------|
| Csf3r-mRN | -4.7      | 1.38      | -7.41      | -2        | 0.0384      | 0.00588   | 0.25      | 0.00467 | Cytokine S | NM_001252651.1:1294 |
| Ccl22-mRN | -4.13     | 1.31      | -6.7       | -1.55     | 0.0573      | 0.00962   | 0.341     | 0.00781 | Chemokin   | NM_009137.2:1096    |
| Cd109-mR  | -3.24     | 1.07      | -5.34      | -1.14     | 0.106       | 0.0247    | 0.453     | 0.00971 | Hemostasi  | NM_153098.3:2720    |

## LPS\_Burn day 14 MV versus NoMV

|            | Log2 fold | std error | (Lower con | Upper con | Linear fold | Lower con | Upper con | P-value  | Gene.sets   | probe.ID         |
|------------|-----------|-----------|------------|-----------|-------------|-----------|-----------|----------|-------------|------------------|
| Tmem173-   | 6.04      | 0.761     | 4.55       | 7.53      | 65.9        | 23.4      | 185       | 2.43E-06 | Host-pathr  | NM_028261.1:130  |
| Icam2-mRI  | 7.02      | 0.908     | 5.24       | 8.8       | 130         | 37.9      | 447       | 3.23E-06 | Adaptive li | NM_010494.1:375  |
| Ifngr1-mRI | 4.59      | 0.723     | 3.17       | 6.01      | 24.1        | 9.03      | 64.4      | 2.54E-05 | Cytokine S  | NM_010511.2:985  |
| Il2rg-mRN  | 4.54      | 0.754     | 3.06       | 6.02      | 23.3        | 8.36      | 64.8      | 4.27E-05 | Cytokine S  | NM_013563.3:1226 |
| Stat3-mRN  | -6.32     | 1.12      | -8.52      | -4.13     | 0.0125      | 0.00273   | 0.0569    | 7.80E-05 | Chemokin    | NM_213659.2:2130 |

|            |       |       |       |       |        |         |        |          |             |                     |
|------------|-------|-------|-------|-------|--------|---------|--------|----------|-------------|---------------------|
| Map4k2-r   | 4.93  | 0.949 | 3.07  | 6.79  | 30.6   | 8.42    | 111    | 0.000172 | TNF Family  | NM_009006.2:666     |
| Pdcd2-mR   | 3.86  | 0.744 | 2.4   | 5.31  | 14.5   | 5.26    | 39.8   | 0.000177 | Apoptosis   | NM_008799.2:837     |
| Tnfrsf11a- | -5.86 | 1.18  | -8.17 | -3.55 | 0.0172 | 0.00348 | 0.0853 | 0.000253 | Cytokine S  | NM_009399.3:3870    |
| Irf5-mRNA  | -4.04 | 0.823 | -5.65 | -2.43 | 0.0609 | 0.0199  | 0.186  | 0.000285 | Cytokine S  | NM_012057.3:1826    |
| Casp8-mRl  | -5.7  | 1.2   | -8.04 | -3.35 | 0.0193 | 0.0038  | 0.0979 | 0.000371 | Apoptosis,  | NM_009812.2:1463    |
| Ebi3-mRN/  | 2.24  | 0.48  | 1.3   | 3.18  | 4.71   | 2.46    | 9.05   | 0.000445 | Cytokine S  | NM_015766.2:1015    |
| Rela-mRN/  | -5.11 | 1.1   | -7.26 | -2.96 | 0.029  | 0.00653 | 0.129  | 0.000449 | Adaptive Ii | NM_009045.4:645     |
| Fyn-mRNA   | -4.92 | 1.09  | -7.06 | -2.79 | 0.033  | 0.00749 | 0.145  | 0.000582 | Adaptive Ii | NM_008054.2:1030    |
| Itgax-mRN  | 5.14  | 1.14  | 2.9   | 7.37  | 35.1   | 7.47    | 165    | 0.000592 | Cell Adhes  | NM_021334.2:3773    |
| Il1a-mRNA  | -5.5  | 1.23  | -7.91 | -3.1  | 0.0221 | 0.00416 | 0.117  | 0.000617 | Cytokine S  | NM_010554.4:225     |
| Ltb-mRNA   | -5.31 | 1.19  | -7.65 | -2.97 | 0.0252 | 0.00498 | 0.128  | 0.000657 | Cytokine S  | NM_008518.2:163     |
| Il7r-mRNA  | 3.82  | 0.864 | 2.13  | 5.52  | 14.2   | 4.38    | 45.8   | 0.000685 | Cytokine S  | NM_008372.3:1020    |
| Il23a-mRN  | 4.71  | 1.07  | 2.62  | 6.8   | 26.2   | 6.14    | 112    | 0.000702 | Cytokine S  | NM_031252.1:360     |
| Crlf2-mRN  | -4.84 | 1.1   | -7    | -2.68 | 0.0349 | 0.0078  | 0.156  | 0.000728 | Cytokine S  | NM_001164735.1:1225 |

#### LPS\_versus NoLPS

|            | Log2 fold | std error | (Lower con | Upper con | Linear fold | Lower con | Upper con | P-value  | Gene.sets   | probe.ID            |
|------------|-----------|-----------|------------|-----------|-------------|-----------|-----------|----------|-------------|---------------------|
| Fcgr2b-mR  | 2.8       | 0.121     | 2.56       | 3.04      | 6.96        | 5.91      | 8.2       | 4.96E-10 | Adaptive Ii | NM_001077189.1:1225 |
| Ebi3-mRN/  | 2.44      | 0.222     | 2.01       | 2.88      | 5.44        | 4.03      | 7.36      | 6.49E-07 | Cytokine S  | NM_015766.2:1015    |
| Il6-mRNA   | 5.55      | 0.589     | 4.4        | 6.71      | 47          | 21.1      | 105       | 2.71E-06 | Cytokine S  | NM_031168.1:40      |
| Gpr183-mI  | -4.29     | 0.544     | -5.36      | -3.23     | 0.0511      | 0.0244    | 0.107     | 1.33E-05 | Lymphocyt   | NM_183031.2:238     |
| Csf2-mRN/  | 6.07      | 1.05      | 4          | 8.13      | 67          | 16        | 281       | 0.000184 | Cytokine S  | NM_009969.4:452     |
| Ccr12-mRN  | 4.7       | 0.867     | 3          | 6.39      | 25.9        | 7.98      | 84.1      | 0.000294 | Chemokine   | NM_017466.4:655     |
| Fcgr3-mRN  | -1.96     | 0.406     | -2.75      | -1.16     | 0.257       | 0.148     | 0.446     | 0.000693 | Host-pathr  | NM_010188.5:1175    |
| Cd24a-mRl  | -3.34     | 0.697     | -4.71      | -1.98     | 0.0986      | 0.0383    | 0.254     | 0.00073  | Lymphocyt   | NM_009846.2:584     |
| Icam2-mRl  | -1.98     | 0.419     | -2.81      | -1.16     | 0.253       | 0.143     | 0.447     | 0.000799 | Adaptive Ii | NM_010494.1:375     |
| Litaf-mRN/ | 1.11      | 0.24      | 0.637      | 1.58      | 2.15        | 1.55      | 2.98      | 0.000955 | Phagocyto   | NM_019980.1:1100    |
| Klra1-mRN  | 5.44      | 1.2       | 3.09       | 7.79      | 43.5        | 8.53      | 222       | 0.00108  | Adaptive Ii | NM_016659.3:105     |
| Blnk-mRN/  | 1.12      | 0.259     | 0.614      | 1.63      | 2.17        | 1.53      | 3.09      | 0.00149  | Adaptive Ii | NM_008528.4:1546    |
| Tlr8-mRNA  | -2.3      | 0.534     | -3.35      | -1.26     | 0.203       | 0.0981    | 0.419     | 0.00153  | Innate lmr  | NM_133212.2:110     |
| Ctsg-mRN/  | 4.99      | 1.17      | 2.71       | 7.28      | 31.8        | 6.52      | 155       | 0.00161  | Host-pathr  | NM_007800.1:785     |
| Csf3r-mRN  | 4.18      | 0.993     | 2.23       | 6.12      | 18.1        | 4.69      | 69.8      | 0.00181  | Cytokine S  | NM_001252651.1:1294 |
| Ifi204-mRN | 3.58      | 0.851     | 1.91       | 5.24      | 11.9        | 3.76      | 37.9      | 0.00182  | Innate lmr  | NM_008329.2:1296    |
| Cd22-mRN   | 4.94      | 1.18      | 2.63       | 7.25      | 30.7        | 6.18      | 152       | 0.00187  | Adaptive Ii | NM_001043317.2:865  |
| Socs1-mRN  | 3.33      | 0.811     | 1.74       | 4.92      | 10.1        | 3.35      | 30.3      | 0.00211  | Adaptive Ii | NM_009896.2:1020    |
| Il10-mRNA  | 3.78      | 0.923     | 1.97       | 5.58      | 13.7        | 3.91      | 48        | 0.00217  | Cytokine S  | NM_010548.1:985     |
| Icos-mRN/  | -2.55     | 0.631     | -3.79      | -1.32     | 0.17        | 0.0723    | 0.402     | 0.00234  | Cell Adhes  | NM_017480.1:142     |
| Cd80-mRN   | 3.74      | 0.938     | 1.9        | 5.58      | 13.4        | 3.74      | 47.9      | 0.00256  | Adaptive Ii | NM_009855.2:210     |
| Ms4a1-mR   | 3.94      | 1.01      | 1.96       | 5.92      | 15.3        | 3.88      | 60.5      | 0.00298  | Lymphocyt   | NM_007641.5:166     |
| Nos2-mRN   | 5.81      | 1.51      | 2.85       | 8.78      | 56.3        | 7.21      | 439       | 0.00324  | Cytokine S  | NM_010927.3:3715    |
| Serping1-n | -4.46     | 1.19      | -6.8       | -2.13     | 0.0453      | 0.00895   | 0.229     | 0.00384  | Compleme    | NM_009776.3:1480    |
| Cd79b-mR   | -4.58     | 1.23      | -6.99      | -2.17     | 0.0418      | 0.00787   | 0.222     | 0.00394  | Adaptive Ii | NM_008339.2:330     |
| Bcl3-mRN/  | 2.55      | 0.693     | 1.19       | 3.9       | 5.84        | 2.28      | 15        | 0.00428  | Lymphocyt   | NM_033601.3:1620    |
| Ccl20-mRN  | -4.25     | 1.18      | -6.55      | -1.94     | 0.0526      | 0.0107    | 0.26      | 0.00474  | Chemokine   | NM_016960.1:120     |
| Ikzf2-mRN  | 4.2       | 1.19      | 1.86       | 6.54      | 18.4        | 3.62      | 93        | 0.00559  | Transcripti | NM_011770.4:7230    |
| Ifitm1-mRl | 4.17      | 1.19      | 1.83       | 6.52      | 18.1        | 3.56      | 91.5      | 0.00578  | Adaptive Ii | NM_001112715.1:412  |
| Ccr9-mRN/  | -3.82     | 1.13      | -6.04      | -1.6      | 0.0709      | 0.0152    | 0.33      | 0.00711  | Chemokine   | NM_009913.6:820     |
| Xcl1-mRN/  | -3.93     | 1.19      | -6.27      | -1.59     | 0.0655      | 0.013     | 0.331     | 0.00807  | Chemokine   | NM_008510.1:103     |
| Spn-mRNA   | -1.79     | 0.546     | -2.86      | -0.725    | 0.288       | 0.137     | 0.605     | 0.00816  | Cell Adhes  | NM_001037810.1:726  |
| Tnfrsf1b-r | 2.15      | 0.657     | 0.864      | 3.44      | 4.44        | 1.82      | 10.8      | 0.00834  | Cytokine S  | NM_011610.3:3270    |
| Lta-mRNA   | 2.83      | 0.864     | 1.14       | 4.52      | 7.12        | 2.2       | 23        | 0.00834  | Cytokine S  | NM_010735.1:1115    |
| Ltb-mRNA   | 2.66      | 0.822     | 1.05       | 4.27      | 6.32        | 2.07      | 19.3      | 0.00891  | Cytokine S  | NM_008518.2:163     |
